# Supplementary material
Source: publisher figshare collection journal article supplement (https://tandf.figshare.com/ndownloader/files/22488054)
Supplement: Supplementary file 1 [file 22488054]

## Sheet: All Data
System 1: Single Tank Existing ND										System 2: Cerro Prieto Scaled									System 3: Current System 3 Existing ND
Trial	H Original	H-Hmin	Cost per Day	Cost for 365 days ($)	Cost/Cost0	H/Hmax	|H-Hmax| /Hmax			Trial	H Original	H Adjusted	Cost per Day	Cost for 365 days ($)	Cost/Cost0	H/Hmax	|H-Hmax| / Hmax		Trial	H Original	H Adjusted	Cost per Day	Cost for 365 days ($)	Cost/Cost0	H/Hmax	|H-Hmax| / Hmax			Branched					Looped						Near
1	25.5	18.5004	0.08	29.2	1	1	0			1	1392.7	332.7	1.26	459.9	1	1	0		1	-30	14.0004	0.61	222.65	1	1	0				Cost	Height			Cost	Height					1	1		1	1
2	23.4444	16.4448	0.08	29.2	1	0.888889	0.111111			2	1355.73	295.733	1.91	697.15	1.51587	0.888888	0.111112		2	-31.5556	12.4448	0.66	240.9	1.08197	0.888889	0.111111			1	1	1		4	1	1					1	0.888889		1.0076	0.888889
3	21.3888	14.3892	0.08	29.2	1	0.777778	0.222222			3	1318.77	258.766	2.55	930.75	2.02381	0.777776	0.222224		3	-33.1112	10.8892	0.68	248.2	1.11475	0.777778	0.222222			1	1	0.888889		4	1.0076	0.888889					1	0.777778		1.01554	0.777778
4	19.3332	12.3336	0.09	32.85	1.125	0.666667	0.333333			4	1281.8	221.799	3.14	1146.1	2.49206	0.666664	0.333336		4	-34.6668	9.3336	0.68	248.2	1.11475	0.666667	0.333333			1	1	0.777778		4	1.01554	0.777778					1.125	0.666667		1.02348	0.666667
5	17.2776	10.278	0.1	36.5	1.25	0.555556	0.444444			5	1244.83	184.832	3.8	1387	3.01587	0.555552	0.444448		5	-36.2224	7.778	0.75	273.75	1.22951	0.555556	0.444444			1	1.125	0.666667		4	1.02348	0.666667					1.25	0.555556		1.02805	0.555556
6	15.222	8.2224	0.1	36.5	1.25	0.444444	0.555556			6	1207.86	147.865	4.39	1602.35	3.48413	0.444439	0.555561		6	-37.778	6.2224	0.75	273.75	1.22951	0.444444	0.555556			1	1.25	0.555556		4	1.02805	0.555556					1.25	0.444444		1.07349	0.444444
7	13.1664	6.1668	0.11	40.15	1.375	0.333333	0.666667			7	1170.9	110.898	5.21	1901.65	4.13492	0.333327	0.666673		7	-39.3336	4.6668	0.76	277.4	1.2459	0.333333	0.666667			1	1.25	0.444444		4	1.07349	0.444444					1.375	0.333333		1.09157	0.333333
8	11.1108	4.1112	0.11	40.15	1.375	0.222222	0.777778			8	1133.93	73.931	5.67	2069.55	4.5	0.222215	0.777785		8	-40.8892	3.1112	0.79	288.35	1.29508	0.222222	0.777778			1	1.375	0.333333		4	1.09157	0.333333					1.375	0.222222		1.14175	0.222222
9	9.0552	2.0556	0.12	43.8	1.5	0.111111	0.888889			9	1096.96	36.964	6.52	2379.8	5.1746	0.111103	0.888897		9	-42.4448	1.5556	0.8	292	1.31148	0.111111	0.888889			1	1.375	0.222222		4	1.14175	0.222222					1.5	0.111111		1.14158	0.111111
10	6.9996	0	0.12	43.8	1.5	0	1			10	1060	0	7.13	2602.45	5.65873	0	1		10	-44.0004	0	0.87	317.55	1.42623	0	1			1	1.5	0.111111		4	1.14158	0.111111				1	1.5	0	4	1.14141	0
																													1	1.5	0		4	1.14141	0					1	1		1	1
																													3	1	1		5	1	1					1.08197	0.888889		1.10899	0.888889
																													3	1.08197	0.888889		5	1.10899	0.888889					1.11475	0.777778		1.23597	0.777778
																													3	1.11475	0.777778		5	1.23597	0.777778					1.11475	0.666667		1.36583	0.666667
																													3	1.11475	0.666667		5	1.36583	0.666667					1.22951	0.555556		1.45791	0.555556
																													3	1.22951	0.555556		5	1.45791	0.555556					1.22951	0.444444		1.5964	0.444444
																													3	1.22951	0.444444		5	1.5964	0.444444					1.2459	0.333333		1.70504	0.333333
																													3	1.2459	0.333333		5	1.70504	0.333333					1.29508	0.222222		1.85468	0.222222
																													3	1.29508	0.222222		5	1.85468	0.222222					1.31148	0.111111		1.80791	0.111111
																													3	1.31148	0.111111		5	1.80791	0.111111				3	1.42623	0	5	1.77878	0
																													3	1.42623	0		5	1.77878	0					1	1		1	1
																													7	1	1		6	1	1					1.0887	0.888889		1.0576	0.888889
																													7	1.02215	0.888889		6	1.0576	0.888889					1.04953	0.777778		1.10585	0.777778
																													7	1.10676	0.777778		6	1.10585	0.777778					1.24024	0.666667		1.16413	0.666667
																													7	1.07478	0.666667		6	1.16413	0.666667					1.27749	0.555556		1.21985	0.555556
																													7	1.08784	0.555556		6	1.21985	0.555556					1.36081	0.444444		1.2695	0.444444
																													7	1.19746	0.444444		6	1.2695	0.444444					1.34135	0.333333		1.32256	0.333333
																													7	1.18091	0.333333		6	1.32256	0.333333					1.31012	0.222222		1.37227	0.222222
System 4: S1 Existing FS										System 5: Existing system contr_existing FS									System 6: S3_existing_2tanks										7	1.18378	0.222222		6	1.37227	0.222222					1.30372	0.111111		1.43151	0.111111
Trial	H Original	H-Hmin	Cost per Day	Cost for 365 days ($)	Cost/Cost0	H/Hmax	|H-Hmax| /Hmax			Trial	H Original	H Adjusted	Cost per Day	Cost for 365 days ($)	Cost/Cost0	H/Hmax	|H-Hmax| / Hmax		Trial	H Original	H Adjusted	Cost per Day	Cost for 365 days ($)	Cost/Cost0	H/Hmax	|H-Hmax| / Hmax			7	1.21301	0.111111		6	1.43151	0.111111				9	1.33022	0	6	1.49546	0
1	700	25	59.19	21604.3	1	1	0			1	597.9	214.9	27.8	10147	1	1	0		1	425	250.02	292.88	106901	1	1	0			7	1.26117	0		6	1.49546	0					1	1		1	1
2	697.222	22.2222	59.64	21768.6	1.0076	0.888888	0.111112			2	574.022	191.022	30.83	11252.9	1.10899	0.888889	0.111111		2	397.22	222.24	309.75	113059	1.0576	0.888889	0.111111			8	1	1		9	1	1					1.04031	0.888889		1.02215	0.888889
3	694.444	19.4444	60.11	21940.2	1.01554	0.777776	0.222224			3	550.144	167.144	34.36	12541.4	1.23597	0.777778	0.222222		3	369.44	194.46	323.88	118216	1.10585	0.777778	0.222222			8	1.0894	0.888889		9	1.0887	0.888889					1.1125	0.777778		1.10676	0.777778
4	691.667	16.6666	60.58	22111.7	1.02348	0.666664	0.333336			4	526.267	143.267	37.97	13859	1.36583	0.666667	0.333333		4	341.66	166.68	340.95	124447	1.16413	0.666667	0.333333			8	1.10464	0.777778		9	1.04953	0.777778					1.1617	0.666667		1.07478	0.666667
5	688.889	13.8888	60.85	22210.2	1.02805	0.555552	0.444448			5	502.389	119.389	40.53	14793.5	1.45791	0.555556	0.444444		5	313.88	138.9	357.27	130404	1.21985	0.555556	0.444444			8	1.12274	0.666667		9	1.24024	0.666667					1.23555	0.555556		1.08784	0.555556
6	686.111	11.111	63.54	23192.1	1.07349	0.44444	0.55556			6	478.511	95.5111	44.38	16198.7	1.5964	0.444444	0.555556		6	286.1	111.12	371.81	135711	1.2695	0.444444	0.555556			8	1.24857	0.555556		9	1.27749	0.555556					1.33965	0.444444		1.19746	0.444445
7	683.333	8.3332	64.61	23582.7	1.09157	0.333328	0.666672			7	454.633	71.6333	47.4	17301	1.70504	0.333333	0.666667		7	258.32	83.34	387.35	141383	1.32256	0.333333	0.666667			8	1.24702	0.444444		9	1.36081	0.444444					1.46801	0.333333		1.18091	0.333334
8	680.556	5.5554	67.58	24666.7	1.14175	0.222216	0.777784			8	430.756	47.7556	51.56	18819.4	1.85468	0.222222	0.777778		8	230.54	55.56	401.91	146697	1.37227	0.222222	0.777778			8	1.35071	0.333333		9	1.34135	0.333333					1.57766	0.222222		1.18378	0.222223
9	677.778	2.7776	67.57	24663	1.14158	0.111104	0.888896			9	406.878	23.8778	50.26	18344.9	1.80791	0.111111	0.888889		9	202.76	27.78	419.26	153030	1.43151	0.111111	0.888889			8	1.42536	0.222222		9	1.31012	0.222222					1.6274	0.111111		1.21301	0.111112
10	675	-0.0002	67.56	24659.4	1.14141	0	1.00001			10	383	0	49.45	18049.2	1.77878	0	1		10	174.98	0	437.99	159866	1.49546	0	1			8	1.45786	0.111111		9	1.30372	0.111111				10	1.62703	0	7	1.26117	0
																													8	1.56393	0		9	1.33022	0								1	1
																													12	1	1		12	1	1								1.0894	0.888889
																													12	1.02419	0.89		12	1.02419	0.888889								1.10464	0.777778
																													12	1.05645	0.78		12	1.05645	0.777778								1.12274	0.666667
																													12	1.08871	0.67		12	1.08871	0.666667								1.24857	0.555556
																													12	1.1129	0.56		12	1.1129	0.555556								1.24702	0.444444
																													12	1.1371	0.44		12	1.1371	0.444444								1.35071	0.333333
																													12	1.17742	0.33		12	1.17742	0.333333								1.42536	0.222222
																													12	1.20161	0.22		12	1.20161	0.222222								1.45786	0.111111
																													12	1.22581	0.11		12	1.22581	0.111111							8	1.56393	0
																													12	1.25	0		12	1.25	0								1	1
																																											1.02419	0.888889
																																											1.05645	0.777779
																																											1.08871	0.666668
																																											1.1129	0.555557
																																											1.1371	0.444446
																																											1.17742	0.333336
																																											1.20161	0.222225
																																											1.22581	0.111114
																																										12	1.25	0
System 7: Original System 4_existing_FS										System 8: S5_existing_tank									System 9: S6_existing_ND
Trial	H Original	H-Hmin	Cost per Day	Cost for 365 days ($)	Cost/Cost0	H/Hmax	|H-Hmax| /Hmax			Trial	H Original	H-Hmin	Cost per Day	Cost for 365 days ($)	Cost/Cost0	H/Hmax	|H-Hmax| /Hmax		Trial	H Original	H-Hmin	Cost per Day	Cost for 365 days ($)	Cost/Cost0	H/Hmax	|H-Hmax| /Hmax
1	610	85	80.37	29335.1	1	1	0			1	514	153.99	84	30660	1	1	0		1	1141	25	78.13	28517.4	1	1	0
2	600.556	75.5556	82.15	29984.8	1.02215	0.888889	0.111111			2	496.89	136.88	91.51	33401.2	1.0894	0.888889	0.111111		2	1138.22	22.2222	85.06	31046.9	1.0887	0.888889	0.111111
3	591.111	66.1111	88.95	32466.8	1.10676	0.777778	0.222222			3	479.78	119.77	92.79	33868.4	1.10464	0.777778	0.222222		3	1135.44	19.4445	82	29930	1.04953	0.777778	0.222222
4	581.667	56.6667	86.38	31528.7	1.07478	0.666667	0.333333			4	462.67	102.66	94.31	34423.2	1.12274	0.666667	0.333333		4	1132.67	16.6667	96.9	35368.5	1.24024	0.666667	0.333333
5	572.222	47.2222	87.43	31912	1.08784	0.555556	0.444444			5	445.56	85.55	104.88	38281.2	1.24857	0.555556	0.444444		5	1129.89	13.8889	99.81	36430.7	1.27749	0.555556	0.444444
6	562.778	37.7778	96.24	35127.6	1.19746	0.444445	0.555555			6	428.45	68.44	104.75	38233.8	1.24702	0.444444	0.555556		6	1127.11	11.1111	106.32	38806.8	1.36081	0.444444	0.555556
7	553.333	28.3334	94.91	34642.2	1.18091	0.333334	0.666666			7	411.34	51.33	113.46	41412.9	1.35071	0.333333	0.666667		7	1124.33	8.33334	104.8	38252	1.34135	0.333333	0.666667
8	543.889	18.8889	95.14	34726.1	1.18378	0.222223	0.777777			8	394.23	34.22	119.73	43701.5	1.42536	0.222222	0.777778		8	1121.56	5.55556	102.36	37361.4	1.31012	0.222222	0.777778
9	534.444	9.44448	97.49	35583.8	1.21301	0.111112	0.888888			9	377.12	17.11	122.46	44697.9	1.45786	0.111111	0.888889		9	1118.78	2.77778	101.86	37178.9	1.30372	0.111111	0.888889
10	525	4e-05	101.36	36996.4	1.26117	0	1			10	360.01	0	131.37	47950.1	1.56393	0	1		10	1116	0	103.93	37934.5	1.33022	0	1
System 10: S7_existing_ND										System 11: Anytown - Pump Reservoir Change Only									System 12: SollaGasWDS-existing_MS														System 13: Bangladesh - SW only , No Pump											System 13: Bangladesh - GW Only
Trial	Res 1 H Original	Res 2 Original	H-Hmin	Cost per Day	Cost for 365 days ($)	Cost/Cost0	H/Hmax	|H-Hmax| /Hmax		Trial	Tank 1 H Original	H-Hmin	Cost per Day	Cost for 365 days ($)	Cost/Cost0	H/Hmax	|H-Hmax| /Hmax		Trial	Tank 1 H Original	H-Hmin	Cost per Day	Cost for 365 days ($)	Cost/Cost0	H/Hmax	|H-Hmax| /Hmax		Trial	Res 1 H Original	Res 2 H Original	Res 3 H Original	H-Hmin	Cost per Day	Cost for 365 days ($)	Cost/Cost0	H/Hmax	|H-Hmax| /Hmax		Trial	Res 1 H Original	Res 2 H Original	Res 3 H Original	Res 4 H Original	H-Hmin	Cost per Day	Cost for 365 days ($)	Cost/Cost0	H/Hmax	|H-Hmax| /Hmax
1	74	74	134	3015.42	1.10063e+06	1	1	0		1	20	107	840.14	306651	1	1	2.79702		1	333.18	28.18	1.24	452.6	1	1	0		1	5	5	5	108	228.23	83303.9	1	1	0		1	5	5	5	5	105	228.23	83303.9	1	1	-0.0277778
2	59.2	59.2	119.2	3136.97	1.14499e+06	1.04031	0.889552	0.110448		2	8.11111	95.1111	810.26	295745	0.964434	0.888889	2.37513		2	330.049	25.0489	1.27	463.55	1.02419	0.888889	0.111111		2	-7	-7	-7	96	228.23	83303.9	1	0.888889	-0.111111		2	-6.11111	-6.11111	-6.11111	-6.11111	93.8889	351.64	128349	1.54073	0.89418	-0.130658
3	44.4	44.4	104.4	3354.66	1.22445e+06	1.1125	0.779104	0.220896		3	-3.77778	83.2222	774.84	282817	0.922275	0.777778	1.95324		3	326.918	21.9178	1.31	478.15	1.05645	0.777779	0.222221		3	-19	-19	-19	84	228.23	83303.9	1	0.777778	-0.222222		3	-18.1111	-18.1111	-18.1111	-18.1111	81.8889	469.8	171477	2.05845	0.779894	-0.24177
4	29.6	29.6	89.6	3503	1278595	1.1617	0.668657	0.331343		4	-15.6667	71.3333	724.64	264494	0.862523	0.666667	1.53135		4	323.787	18.7867	1.35	492.75	1.08871	0.666668	0.333332		4	-31	-31	-31	72	228.23	83303.9	1	0.666667	-0.333333		4	-30.1111	-30.1111	-30.1111	-30.1111	69.8889	569.52	207875	2.49538	0.665608	-0.352881
5	14.8	14.8	74.8	3725.7	1.35988e+06	1.23555	0.558209	0.441791		5	-27.5556	59.4444	668.14	243871	0.795272	0.555556	1.10946		5	320.656	15.6556	1.38	503.7	1.1129	0.555557	0.444443		5	-43	-43	-43	60	228.23	83303.9	1	0.555556	-0.444444		5	-42.1111	-42.1111	-42.1111	-42.1111	57.8889	640.73	233866	2.80739	0.551323	-0.463992
6	0	0	60	4039.62	1.47446e+06	1.33965	0.447761	0.552239		6	-39.4444	47.5556	605.92	221161	0.721213	0.444444	0.687564		6	317.524	12.5245	1.41	514.65	1.1371	0.444446	0.555554		6	-55	-55	-55	48	228.23	83303.9	1	0.444444	-0.555556		6	-54.1111	-54.1111	-54.1111	-54.1111	45.8889	643.42	234848	2.81917	0.437037	-0.575103
7	-14.8	-14.8	45.2	4426.68	1.61574e+06	1.46801	0.337313	0.662687		7	-51.3333	35.6667	536.46	195808	0.638536	0.333333	0.265673		7	314.393	9.3934	1.46	532.9	1.17742	0.333336	0.666664		7	-67	-67	-67	36	228.23	83303.9	1	0.333333	-0.666667		7	-66.1111	-66.1111	-66.1111	-66.1111	33.8889	621.53	226858	2.72326	0.322751	-0.686214
8	-29.6	-29.6	30.4	4757.31	1.73642e+06	1.57766	0.226866	0.773134		8	-63.2222	23.7778	457.51	166991	0.544564	0.222222	0.156218		8	311.262	6.2623	1.49	543.85	1.20161	0.222225	0.777775		8	-79	-79	-79	24	228.23	83303.9	1	0.222222	-0.777778		8	-78.1111	-78.1111	-78.1111	-78.1111	21.8889	661.29	241371	2.89747	0.208466	-0.797325
9	-44.4	-44.4	15.6	4907.28	1.79116e+06	1.6274	0.116418	0.883582		9	-75.1111	11.8889	336.2	122713	0.400171	0.111111	0.578109		9	308.131	3.1312	1.52	554.8	1.22581	0.111114	0.888886		9	-91	-91	-91	12	228.23	83303.9	1	0.111111	-0.888889		9	-90.1111	-90.1111	-90.1111	-90.1111	9.88889	661.08	241294	2.89655	0.0941799	-0.908436
10	-60	-60	0	4906.19	1.79076e+06	1.62703	0	1		10	-87	0	105.85	38635.2	0.125991	0	1		10	305	0.0001	1.55	565.75	1.25	0	0.999996		10	-103	-103	-103	0	228.23	83303.9	1	0	-1		10	-100	-100	-100	-100	0	584.53	213353	2.56114	0	-1
				*run 3165 hrs
																																							System 14 - BWCN
																																							Trial	Lake 1 H Original	Cost per Day	Cost for 365 days ($)	Cost/Cost0	H/Hmax	|H-Hmax| /Hmax
	1		1				y=-0.49x+1.49																																1	59	3785.77	1.38181e+06	1	1	0
	0.888889		1	System 1																																			2	57.6667	3841.99	1.40233e+06	1.01485	0.888889	0.111111
	0.777778		1																																				3	56.3333	3895.32	1.42179e+06	1.02894	0.777779	0.222221
	0.666667		1.125																																				4	55	3955.35	1.4437e+06	1.04479	0.666668	0.333332
	0.555556		1.25			Middle	High	Low																															5	53.6667	4011.23	1.4641e+06	1.05955	0.555557	0.444443
	0.444445		1.25		0	1.4947	1.9316	1.1508																															6	52.3333	4070.44	1.48571e+06	1.07519	0.444446	0.555554
	0.333334		1.375		0.1	1.44571	1.8435	1.13394																															7	51	4127.3	1.50646e+06	1.09021	0.333336	0.666664
	0.222223		1.375		0.2	1.39672	1.7554	1.11708																															8	49.6667	4287.22	1.56484e+06	1.13246	0.222225	0.777775
	0.111112		1.5		0.3	1.34773	1.6673	1.10022																															9	48.3333	4193.09	1.53048e+06	1.10759	0.111114	0.888886
	0		1.5		0.4	1.29874	1.5792	1.08336																															10	47	4199.92	1.53297e+06	1.1094	0	0.999996
	1		1	System 3	0.5	1.24975	1.4911	1.0665
	0.888889		1.08197		0.6	1.20076	1.403	1.04964
	0.777778		1.11475		0.7	1.15177	1.3149	1.03278
	0.666667		1.11475		0.8	1.10278	1.2268	1.01592																															System 15 - Rossman 20001
	0.555556		1.22951		0.9	1.05379	1.1387	0.99906																															Trial	Lake 1 H Original	River 2 H Original	H1-H1min	H2-H2min	Cost per Day	Cost for 365 days ($)	Cost/Cost0	H/Hmax	|H-Hmax| /Hmax
	0.444445		1.22951		1	1	1	1																															1	167	220	113	281	454.56	165914	1	1	0
	0.333334		1.2459																																				2	154.444	188.778	100.444	249.778	649.48	237060	1.42881	0.888889	0.111111
	0.222223		1.29508		0.4369	0.3439	0																																3	141.889	157.556	87.8889	218.556	771.86	281729	1.69804	0.777779	0.222221
	0.111112		1.31148		0.39779	0.31177	0.1																																4	129.333	126.333	75.3333	187.333	767.58	280167	1.68862	0.666668	0.333332
	0		1.42623		0.35868	0.27964	0.2																																5	116.778	95.1111	62.7778	156.111	745.93	272264	1.64099	0.555557	0.444443
	1		1	System 5	0.31957	0.24751	0.3																																6	104.222	63.8889	50.2222	124.889	708.13	258467	1.55784	0.444446	0.555554
	0.888889		1.10899		0.28046	0.21538	0.4																																7	91.6667	32.6667	37.6667	93.6667	643.12	234739	1.41482	0.333336	0.666664
	0.777778		1.23597		0.24135	0.18325	0.5																																8	79.1111	1.44444	25.1111	62.4444	549.87	200703	1.20968	0.222225	0.777775
	0.666667		1.36583		0.20224	0.15112	0.6																																9	66.5556	-29.7778	12.5556	31.2222	418.62	152796	0.920935	0.111114	0.888886
	0.555556		1.45791		0.16313	0.11899	0.7																																10	54	-61	0	0	228.99	83581.4	0.503762	0	0.999996
	0.444445		1.5964		0.12402	0.08686	0.8
	0.333334		1.70504		0.08491	0.05473	0.9
	0.222223		1.85468		0	0	1
	0.111112		1.80791
	0		1.77878
	1		1	System 6
	0.888889		1.0576				1.32275
	0.777778		1.10585
	0.666667		1.16413
	0.555556		1.21985
	0.444445		1.2695
	0.333334		1.32256
	0.222223		1.37227
	0.111112		1.43151
	0		1.49546
	1		1	System 7
	0.888889		1.02215
	0.777778		1.10676
	0.666667		1.07478
	0.555556		1.08784
	0.444445		1.19746
	0.333334		1.18091
	0.222223		1.18378
	0.111112		1.21301
	0		1.26117
	1		1	System 8
	0.888889		1.0894
	0.777778		1.10464
	0.666667		1.12274
	0.555556		1.24857
	0.444445		1.24702
	0.333334		1.35071
	0.222223		1.42536
	0.111112		1.45786
	0		1.56393
	1		1	System 9
	0.888889		1.0887
	0.777778		1.04953
	0.666667		1.24024
	0.555556		1.27749
	0.444445		1.36081
	0.333334		1.34135
	0.222223		1.31012
	0.111112		1.30372
	0		1.33022
	1		1	System 10
	0.888889		1.04031
	0.777778		1.1125
	0.666667		1.1617
	0.555556		1.23555
	0.444445		1.33965
	0.333334		1.46801
	0.222223		1.57766
	0.111112		1.6274
	0		1.62703
	1		1	System 12
	0.888889		1.02419
	0.777778		1.05645
	0.666667		1.08871
	0.555556		1.1129
	0.444445		1.1371
	0.333334		1.17742
	0.222223		1.20161
	0.111112		1.22581
	0		1.25

## Sheet: ElevationChange Reservoir Level
System	Hmax (feet)	Hmin (feet)	delta H	Res Max ft	Res min ft	Delta res	Ratio	Slope of Cost
1	186.6	180.761	5.8392	83.64	22.96	60.68	10.3918	1.5
2	1472.91	1461.42	11.49	1392.9	1060	332.9	28.973	5.66
3	115.78	100.568	15.212	-98.4	-144.32	45.92	3.01867	1.43
4	866.35	835.24	31.11	700	675	25	0.8036	1.14
5	768.33	694.57	73.76	597.9	383	214.9	2.9135	1.78
6	2072.8	1994	78.8	425	174.98	250.02	3.17284	1.5
7	1011	909	102	610	525	85	0.833333	1.26
8	2835	2641	194	514	360	154	0.793814	1.56
9	1365	1285	80	1141	1116	25	0.3125	1.33
10	1142	698	444	74	-60	134	0.301802	1.63
11			0			0	#DIV/0!
12	1484.2	1474.36	9.84	1092.83	1000.4	92.4304	9.39333	1.25
13			0			0	#DIV/0!
14	2091	1677.72	413.28	193.52	154.16	39.36	0.0952381	1.1
15			0			0	#DIV/0!
1	1.5	10.3918
2	5.66	28.973
3	1.43	3.01867
4	1.14	0.8036
5	1.78	2.9135
6	1.5	3.17284
7	1.26	0.833333
8	1.56	0.793814
9	1.33	0.3125
10	1.63	0.301802
12	1.25	9.3933
14	1.1	0.0952

## Sheet: Pump Tank Location
	ND			NS		4	FS			MS
System 1	1	1	System 2	1	1	5	1	1	8	1	1
	1	0.888889		1.51587	0.888888	6	1.0076	0.888888	12	1.0894	0.888889
	1	0.777778		2.02381	0.777776	7	1.01554	0.777776	14	1.10464	0.777778
	1.125	0.666667		2.49206	0.666664		1.02348	0.666664	15	1.12274	0.666667
	1.25	0.555556		3.01587	0.555552		1.02805	0.555552		1.24857	0.555556
	1.25	0.444444		3.48413	0.444439		1.07349	0.44444		1.24702	0.444444
	1.375	0.333333		4.13492	0.333327		1.09157	0.333328		1.35071	0.333333
	1.375	0.222222		4.5	0.222215		1.14175	0.222216		1.42536	0.222222
	1.5	0.111111		5.1746	0.111103		1.14158	0.111104		1.45786	0.111111
	1.5	0		5.65873	0		1.14141	0		1.56393	0
System 3	1	1					1	1		1	1
	1.08197	0.888889					1.10899	0.888889		1.02419	0.888889
	1.11475	0.777778					1.23597	0.777778		1.05645	0.777779
	1.11475	0.666667					1.36583	0.666667		1.08871	0.666668
	1.22951	0.555556					1.45791	0.555556		1.1129	0.555557
	1.22951	0.444444					1.5964	0.444444		1.1371	0.444446
	1.2459	0.333333					1.70504	0.333333		1.17742	0.333336
	1.29508	0.222222					1.85468	0.222222		1.20161	0.222225
	1.31148	0.111111					1.80791	0.111111		1.22581	0.111114
	1.42623	0					1.77878	0		1.25	0
System 9	1	1					1	1		1	0
	1.0887	0.888889					1.0576	0.888889		0.888889	0.111111
	1.04953	0.777778					1.10585	0.777778		0.777779	0.222221
	1.24024	0.666667					1.16413	0.666667		0.666668	0.333332
	1.27749	0.555556					1.21985	0.555556		0.555557	0.444443
	1.36081	0.444444					1.2695	0.444444		0.444446	0.555554
	1.34135	0.333333					1.32256	0.333333		0.333336	0.666664
	1.31012	0.222222					1.37227	0.222222		0.222225	0.777775
	1.30372	0.111111					1.43151	0.111111		0.111114	0.888886
	1.33022	0					1.49546	0		0	0.999996
System 10	1	1					1	1
	1.04031	0.889552					1.02215	0.888889
	1.1125	0.779104					1.10676	0.777778
	1.1617	0.668657					1.07478	0.666667
	1.23555	0.558209					1.08784	0.555556
	1.33965	0.447761					1.19746	0.444445
	1.46801	0.337313					1.18091	0.333334
	1.57766	0.226866					1.18378	0.222223
	1.6274	0.116418					1.21301	0.111112
	1.62703	0					1.26117	0
